# Supplementary material for: In situ construction of sulfated TiO2 nanoparticles with TiOSO4 for enhanced photocatalytic hydrogen production
Source: Royal Society of Chemistry journal article supplement (doi:10.1039/d0nr06436j), 2020-12-09
Supplement: d0nr06436j1.pdf [file d0nr06436j1.pdf]

## Supplementary Information

### **In situ construction of sulfated TiO<sub>2</sub> nanoparticles with TiOSO<sub>4</sub> for enhanced photocatalytic hydrogen production**

Xueqing Shao<sup>a</sup>, Feng Xiao<sup>b, c</sup>, Xueying Zhao<sup>a</sup>, Zhiyan Hou<sup>a</sup>, Fan Yue<sup>a</sup>, Lu Wang<sup>a</sup>, Ronglan Wu<sup>a</sup>, Jide Wang<sup>a</sup>, Xintai Su<sup>b, c\*</sup>, Chao Yang<sup>a\*</sup>

<sup>a</sup> Ministry Key Laboratory of Oil and Gas Fine Chemicals, School of Chemical Engineering and Technology, Xinjiang University, Urumqi 830046, China

<sup>b</sup> School of Environment and Energy, The Key Laboratory of Pollution Control and Ecosystem Restoration in Industry Clusters (Ministry of Education), South China University of Technology, Guangzhou, Guangdong, 510006, China

<sup>c</sup> Guangdong Provincial Key Laboratory of Solid Wastes Pollution Control and Recycling, Guangzhou, Guangdong, 510006, China

\*Corresponding author

Xintai Su (E-mail: [suxintai827@163.com](mailto:suxintai827@163.com))

Chao Yang (E-mail: [jerryyang1924@163.com](mailto:jerryyang1924@163.com))

### The calculation of activation energy

The activation energy of each reaction stage was calculated according to the kinetic formula of the thermal decomposition of solids. At the constant heating rate, the parametric Eq S1<sup>1</sup> is expressed as follows:

$$d\alpha/dT = A/\beta \exp(-E/RT) (1-\alpha)^n \quad (\text{Eq S1})$$

taking logarithms on both sides of the Eq S1 yields the following equation

$$\ln(d\alpha/dT) = \ln[(A/\beta) (1-\alpha)^n] - E/RT \quad (\text{Eq S2})$$

where  $\alpha$  is the conversion of the reactant defined by  $\alpha_t = (m_0 - m_t)/(m_0 - m_\infty)$ ,  $m_0$ ,  $m_t$ ,  $m_\infty$  represent the initial mass, the mass at time  $t$  and the final mass of the samples, respectively,  $A$  is the pre-exponential factor ( $\text{s}^{-1}$ ),  $\beta$  is the constant heating rate ( $\text{K min}^{-1}$ ),  $E$  is the activation energy of decomposition ( $\text{kJ mol}^{-1}$ ),  $T$  is the temperature ( $\text{K}$ ). It can be seen from the Eq S2 that there is a linear correlation between  $\ln(d\alpha/dT)$  and  $1/T$ . Taking  $1/T$  as abscissa and  $\ln(d\alpha/dT)$  as ordinate, the straight slope  $-E/R$  can be obtained.

### The calculation of AQE

In our work, the cut-off of the UV light filter is 365 nm, the intensity of light measured at 100  $\text{mW cm}^{-2}$ , and the irradiated surface area was approximately 38.5  $\text{cm}^2$ .

$$\begin{aligned} \text{AQE} &= \frac{2 \times \text{the number of generated } H_2 \text{ molecules}}{\text{the number of incident photons}} \times 100\% \\ &= \frac{2 \times n_{H_2} \times N_A \times h \times c}{I \times S \times t \times \lambda} \times 100\% \end{aligned}$$

where Avogadro's number is  $6.022 \times 10^{23} \text{ mol}^{-1}$ ,  $h$  is the Planck's constant ( $6.626 \times 10^{-34} \text{ m}^2 \text{ kg s}^{-1}$ ),  $c$  is the speed of light ( $3 \times 10^8 \text{ m s}^{-1}$ ), and  $\lambda$  is the wavelength of the light source (365 nm).

$$\begin{aligned} \text{AQE} &= \frac{2 \times 16.68 \times 50 \times 10^{-6} \times 6.022 \times 10^{23} \times 6.626 \times 10^{-34} \times 3 \times 10^8}{100 \times 38.5 \times 10^{-3} \times 3600 \times 365 \times 10^{-9}} \times 100\% \\ &= 3.9\% \end{aligned}$$

### The cycle test procedure

For the first cycle, 50 mg fresh catalyst was ultrasonically dispersed in 100 mL of aqueous methanol (methanol 20 vol%), and Pt (3 wt%) was used as the cocatalyst. Centrifugally collecting the catalyst after the first cycle, washing with water and ethanol for three times, and dried. For the

second cycle, the used catalyst was tested under the same conditions as described above, except for Pt. The next several cycles follow the same procedure.

**Table S1.** BET specific surface area, average pore diameter and pore capacity of TS-0CTAC, TS-5CTAC and TS-12.5CTAC.

| Samples     | $S_{\text{BET}}$<br>( $\text{m}^2 \text{g}^{-1}$ ) | Average pore size<br>(nm) | Pore volume<br>( $\text{cm}^3 \text{g}^{-1}$ ) |
|-------------|----------------------------------------------------|---------------------------|------------------------------------------------|
| TS-0CTAC    | 31.4                                               | 15.17                     | 0.1435                                         |
| TS-5CTAC    | 118.9                                              | 6.63                      | 0.2857                                         |
| TS-12.5CTAC | 103.1                                              | 7.96                      | 0.3198                                         |

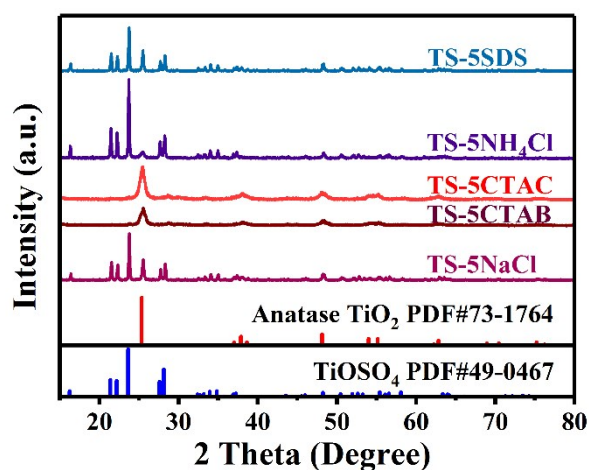

**Fig. S1.** (a) XRD patterns of the TS-5Y samples prepared with different auxiliaries

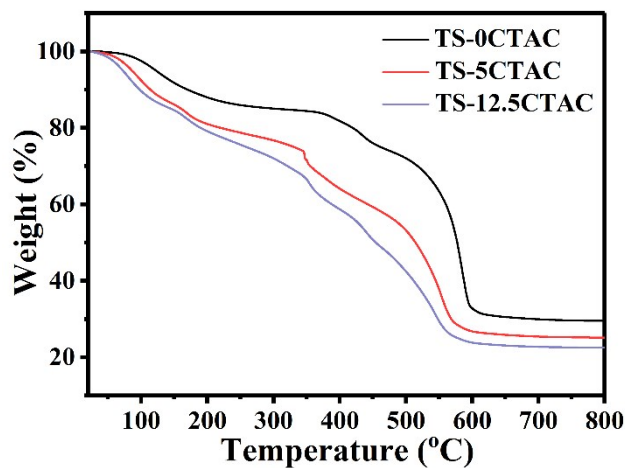

**Fig. S2.** TGA curves of the precursors of TS-0CTAC, TS-5CTAC and TS-12.5CTAC.

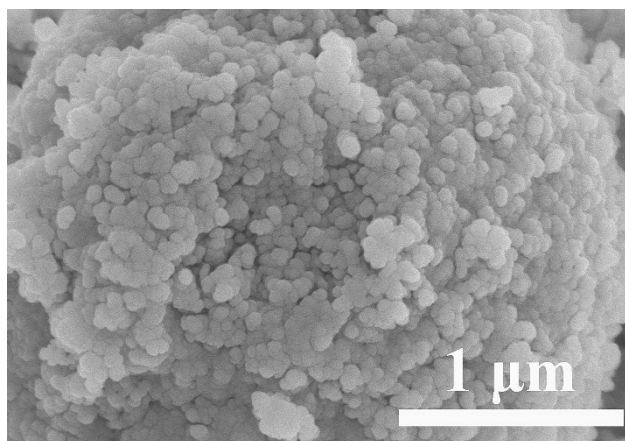

**Fig. S3.** SEM images of the TS-5CTAC.

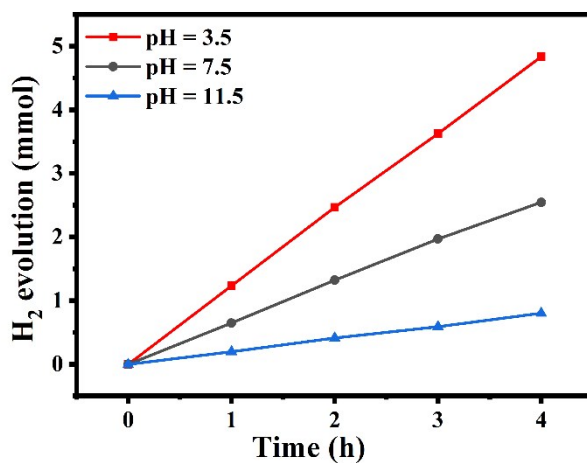

**Fig. S4.** The comparison of photocatalytic H<sub>2</sub> evolutions of TS-5CTAC sample with different pH values.

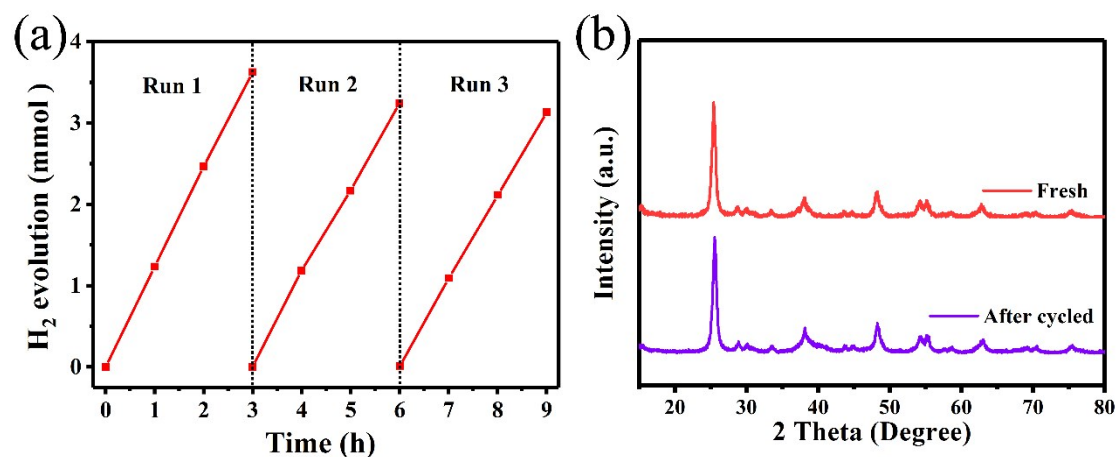

**Fig. S5.** (a) The durability test under continuous illumination for 9 h and (b) the comparison of XRD patterns of TS-5CTAC before and after the reaction 9 h.

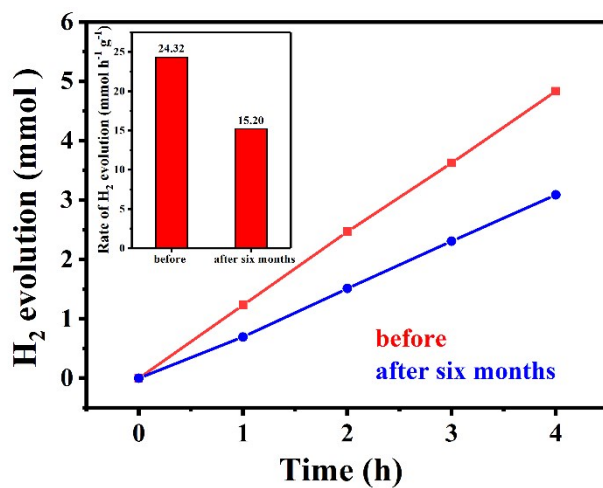

**Fig. S6.** The comparison of photocatalytic H<sub>2</sub> evolutions and photocatalytic H<sub>2</sub> evolution rates (inset) of TS-5CTAC before and after six months.

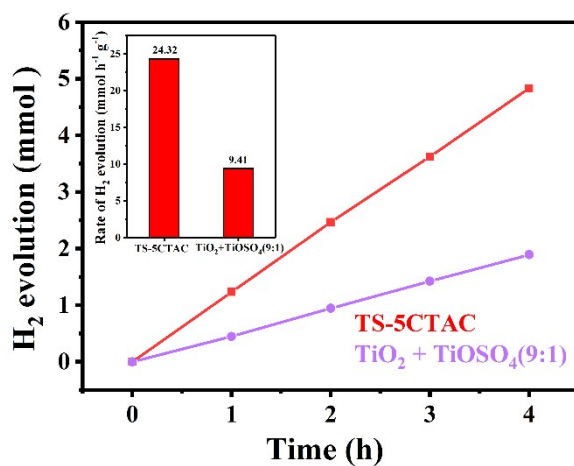

**Figure S7.** The comparison of photocatalytic H<sub>2</sub> evolutions and photocatalytic H<sub>2</sub> evolution rates (inset) of TS-5CTAC and the physical mixture of TiO<sub>2</sub> and TiOSO<sub>4</sub> (9:1).

**Table S2.** S content of TS-5CTAC in fresh, 1st and 3rd cycle

| TS-5CTAC Sample | S content (%) |
|-----------------|---------------|
| Fresh           | 2.022         |
| 1st cycle       | 1.351         |
| 3rd cycle       | 0.221         |

**Table S3.** Photocatalytic H<sub>2</sub> production of different catalysts.

| Catalysts                                       | Amount of catalysts (mg) | H <sub>2</sub> evolution (mmol h <sup>-1</sup> g <sup>-1</sup> ) | Light source Wavelength (nm)     | Reference    |
|-------------------------------------------------|--------------------------|------------------------------------------------------------------|----------------------------------|--------------|
| TiO <sub>2</sub> (B)/anatase                    | 20                       | 5.01                                                             | 300 W Xe lamp simulated sunlight | <sup>2</sup> |
| Sulfate anchored N-TiO <sub>2</sub>             | 50                       | 5.08                                                             | 125 W Hg lamp (> 400 nm)         | <sup>3</sup> |
| Au/S, N-TiO <sub>2</sub>                        | 50                       | 5.35                                                             | 125 W Hg lamp (> 400 nm)         | <sup>4</sup> |
| Pt/Cu/TiO <sub>2</sub>                          | 14                       | 27.20                                                            | 300 W Xe lamp (350–400 nm)       | <sup>5</sup> |
| Ag/N-TiO <sub>2</sub>                           | 20                       | 4.70                                                             | 300 W Xe lamp simulated sunlight | <sup>6</sup> |
| Au/SrTiO <sub>3</sub> /TiO <sub>2</sub>         | 100                      | 0.47                                                             | 300 W Xe lamp simulated sunlight | <sup>7</sup> |
| SO <sub>4</sub> <sup>2-</sup> -TiO <sub>2</sub> | 50                       | 24.32                                                            | 300 W Xe lamp simulated sunlight | This work    |

## References

- 1 X. Gao, L. Jiang and Q. Xu, *J. Hazard. Mater.*, 2020, **386**, 121645.
- 2 S. Lu, S. Yang, X. Hu, Z. Liang, Y. Guo, Y. Xue, H. Cui and J. Tian, *Int. J. Hydrogen Energy*, 2019, **44**, 24398-24406.
- 3 S. Pany and K. M. Parida, *ACS Sustain. Chem. Eng.*, 2014, **2**, 1429-1438.
- 4 S. Pany, B. Naik, S. Martha and K. Parida, *ACS Appl. Mater. Interfaces*, 2014, **6**, 839-846.
- 5 M. V. Dozzi, G. L. Chiarello, M. Pedroni, S. Livraghi, E. Giamello and E. Selli, *Appl. Catal., B*, 2017, **209**, 417-428.
- 6 S. Yang, H. Wang, H. Yu, S. Zhang, Y. Fang, S. Zhang and F. Peng, *Int. J. Hydrogen Energy*, 2016, **41**, 3446-3455.
- 7 S. Han, L. Yu, H. Zhang, Z. Chu, X. Chen, H. Xi and J. Long, *ChemCatChem*, 2019, **11**, 6203-6207.
